# Supplementary material for: Defining the landscape of metabolic dysregulations in cancer metastasis
Source: PubMed Central journal article supplement (PMC8971193; doi:10.1007/s10585-021-10140-9), 2021-12-18

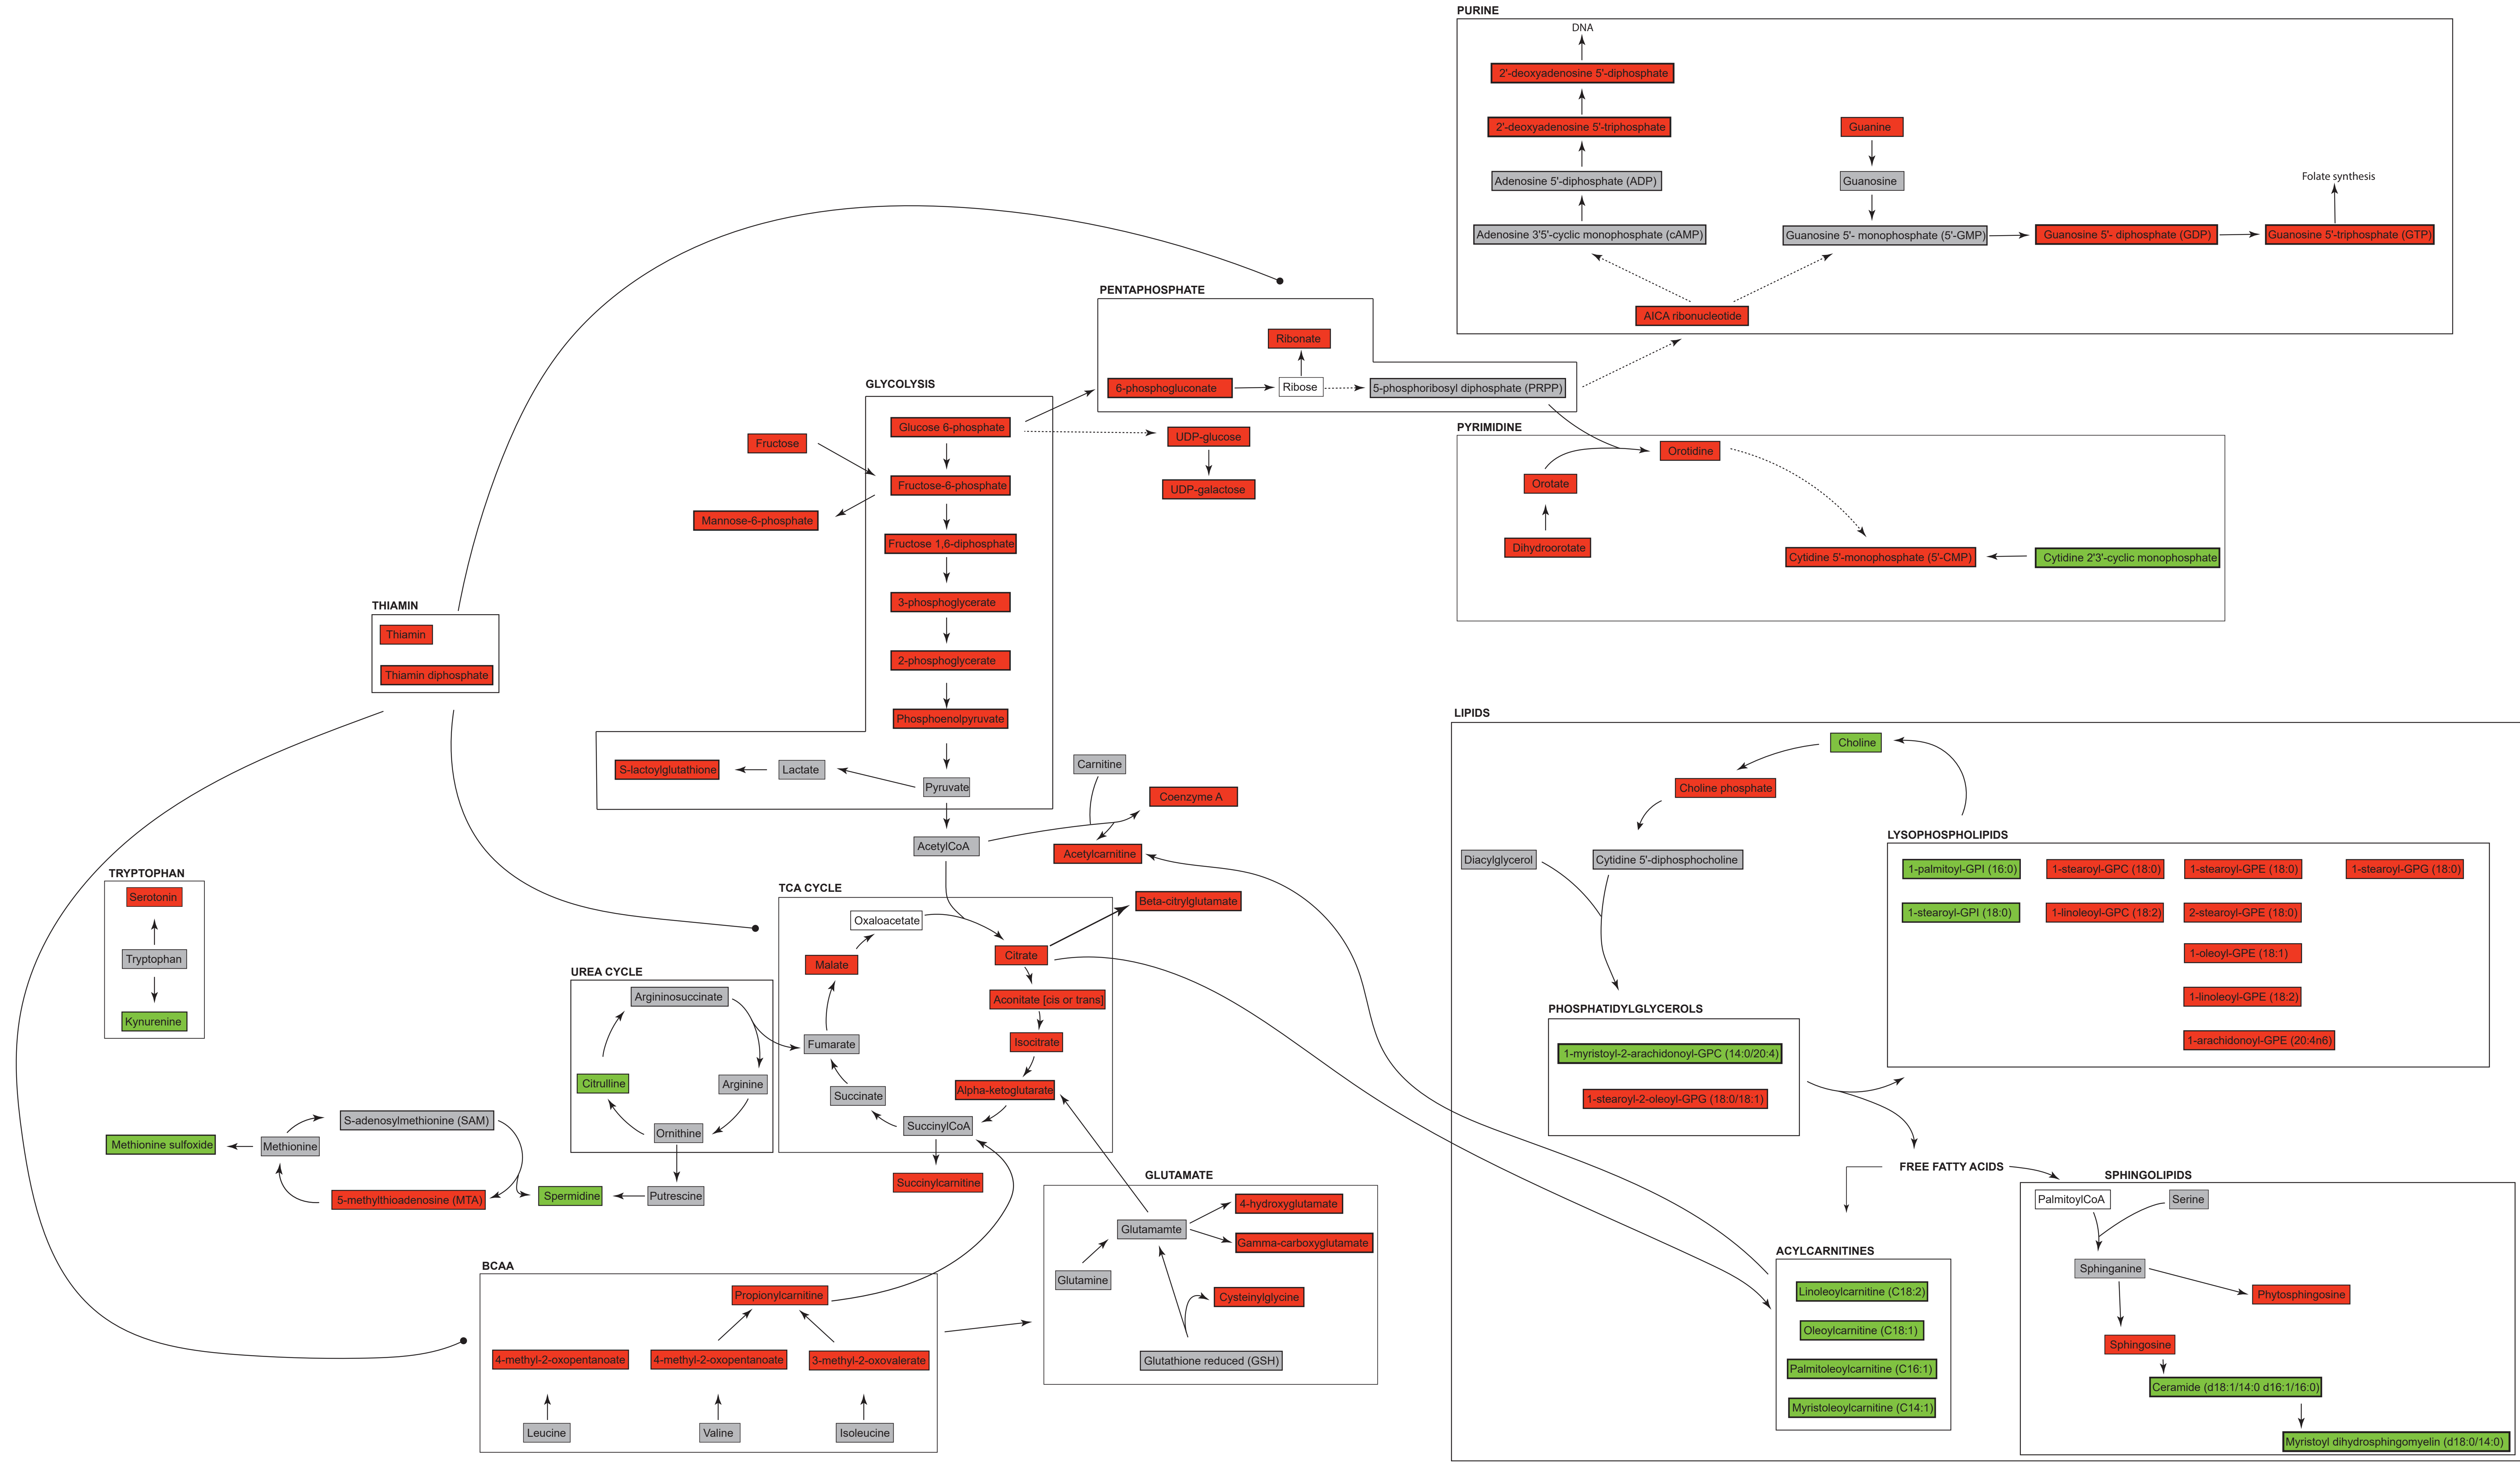

Supplement: 10585_2021_10140_MOESM3_ESM.pdf [file 10585_2021_10140_MOESM3_ESM.pdf]
