# Supplementary material for: Defining the landscape of metabolic dysregulations in cancer metastasis
Source: PubMed Central journal article supplement (PMC8971193; doi:10.1007/s10585-021-10140-9), 2021-12-18

**A)**

2-hydroxy-3-methylvalerate

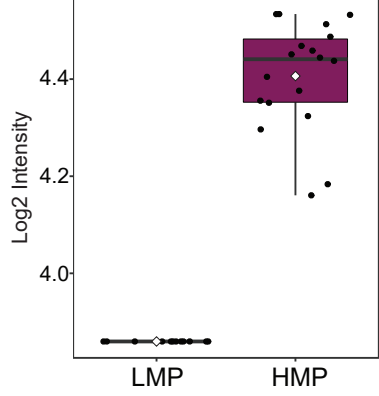

Alpha-hydroxyisocaproate

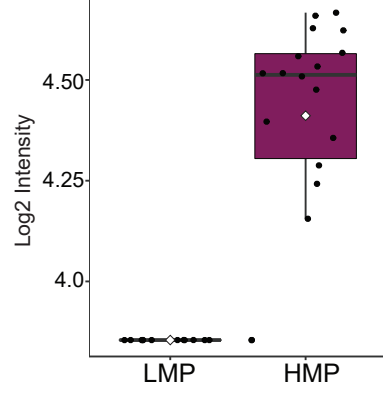

4-methyl-2-oxopentanoate

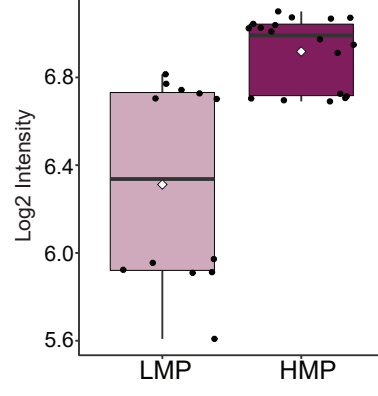

3-methyl-2-oxovalerate

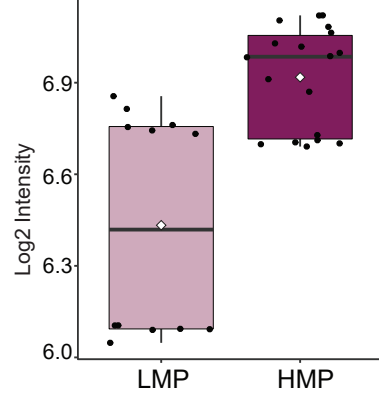

3-methyl-2-oxobutyrate

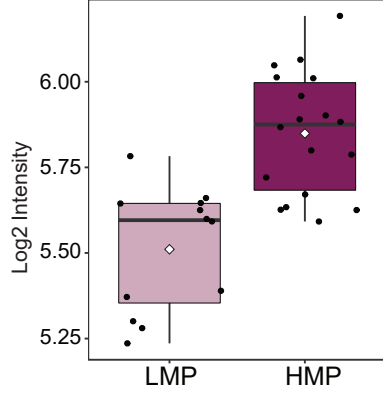**B)**

3-methyl-2-oxovalerate

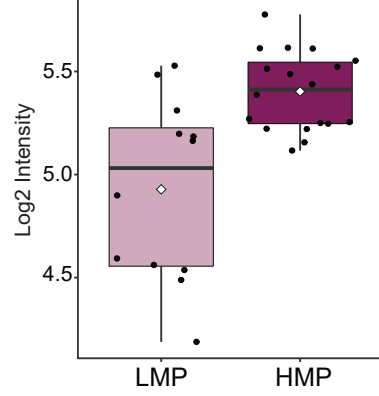

3-methyl-2-oxobutyrate

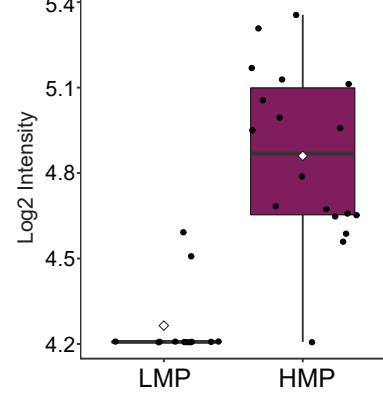

4-methyl-2-oxopentanoate

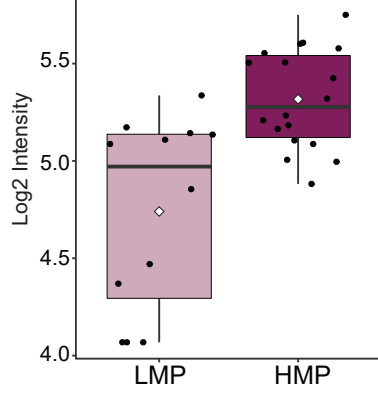

Supplement: 10585_2021_10140_MOESM4_ESM.pdf [file 10585_2021_10140_MOESM4_ESM.pdf]
